# Supplementary material for: Effectiveness of peer-led intervention in control of non-communicable diseases in rural areas of Khordha district: study protocol for a cluster randomized controlled trial
Source: Springer Nature journal article supplement (doi:10.1186/s13063-023-07824-w), 2024-01-03
Supplement: MOESM1 [file 26589426]

### Supplementary File 01

There was no study available for peer-led intervention and NCD control in the Indian context. Based on our experience and expert opinion, we have considered effect size as 20%.

The sample size was calculated using nMaster application (<https://www.cmc-biostatistics.ac.in/nmaster/>) with the formula for cluster study design-

$$n = \frac{\left( z_{\frac{\alpha}{2}} + z_{1-\beta} \right)^2 [p_1(1-p_1) + p_2(1-p_2)] [1 + (m-1)\rho]}{(p_1 - p_2)^2}$$

Where P1= proportion of outcome in the experimental group

P2= proportion of outcome in the control group

$\alpha$ = level of significance

1- $\beta$ = power

$\rho$ = Intra-cluster correlation coefficient

m= size of the cluster

Considering the proportion of outcome in the control group as 50%, an alpha of 5%, power of 90%, effect size of 20%, design effect of 2.5 and loss to follow-up as 20%, the estimated sample size was 720 participants (40 clusters with 18 participants in each cluster)

nMaster 2.0

File Edit Tools Help

New Open Save Save in Excel Cut Copy Paste Fill Right Print Calculator SD Calculator Clear

Sample Size Based on: Cluster design

Number of Groups: Two

Tests Available: Unmatched studies - Comparison of proportions (Design Effect)

Cluster Design - Two groups - Unmatched studies - Comparison of proportions (Design Effect)

Help Save in Word Save in

|                                                 | Col. 1 | Col. 2 | Col. 3 | Col. 4 | Col. 5 | Col. 6 | Col. 7 | Col. 8 | Col. 9 |
|-------------------------------------------------|--------|--------|--------|--------|--------|--------|--------|--------|--------|
| Proportion of outcome in the experimental group | 0.7    |        |        |        |        |        |        |        |        |
| Proportion of outcome in the control group      | 0.5    |        |        |        |        |        |        |        |        |
| Size of the cluster                             | 15     |        |        |        |        |        |        |        |        |
| Design effect                                   | 2.5    |        |        |        |        |        |        |        |        |
| Power (1 - $\beta$ ) %                          | 90     |        |        |        |        |        |        |        |        |
| $\alpha$ Error (%)                              | 5      |        |        |        |        |        |        |        |        |
| 1 or 2 sided                                    | 2      |        |        |        |        |        |        |        |        |
| No. of clusters required                        | 20     |        |        |        |        |        |        |        |        |
| Required sample size                            | 302    |        |        |        |        |        |        |        |        |

**Number of Cluster:**  
The required number of cluster for the study

**Customary:**  
Any integer > 0

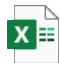

Sample\_Size\_Peer\_Le  
d\_Intervention\_SERB\_
